# Supplementary material
Source: publisher figshare collection journal article supplement (https://springernature.figshare.com/articles/dataset/_/7609397)
Supplement: Supplementary file [file 14127512]

Table S4

**Apobec 3G - LD Calculations  
1000G- All Groups**

| RS_number          | S60S<br>1.13E+08 | F119F<br>5757465 | H186R<br><b>8177832</b> | R256H<br>17000736 | Q275E<br>17496046 | G363R<br>1.48E+08 | L371L<br>11545130 |
|--------------------|------------------|------------------|-------------------------|-------------------|-------------------|-------------------|-------------------|
|                    | D'               | D'               | D'                      | D'                | D'                | D'                | D'                |
| rs112603901        | 1                | 1                | 1                       | 1                 | 1                 | 1                 | 1                 |
| rs5757465          | 1                | 1                | 1                       | 1                 | 1                 | 1                 | 1                 |
| <b>rs8177832</b>   | 1                | 1                | 1                       | 1                 | 1                 | 1                 | 1                 |
| <b>rs17000736</b>  | 1                | 1                | 1                       | 1                 | 1                 | 1                 | 1                 |
| <b>rs17496046</b>  | 1                | 1                | 1                       | 1                 | 1                 | 1                 | 1                 |
| <b>rs148267053</b> | 1                | 1                | 1                       | 1                 | 1                 | 1                 | 1                 |
| rs11545130         | 1                | 1                | 1                       | 1                 | 1                 | 1                 | 1                 |
|                    | R <sup>2</sup>   | R <sup>2</sup>   | R <sup>2</sup>          | R <sup>2</sup>    | R <sup>2</sup>    | R <sup>2</sup>    | R <sup>2</sup>    |
| rs112603901        | 1                | 0                | 0                       | 0                 | 0                 | 0                 | 0                 |
| rs5757465          | 0                | 1                | 0.068                   | 0.002             | 0.024             | 0.002             | 0.003             |
| <b>rs8177832</b>   | 0                | 0.068            | 1                       | 0.001             | 0.01              | 0.001             | 0.001             |
| <b>rs17000736</b>  | 0                | 0.002            | 0.001                   | 1                 | 0                 | 0                 | 0                 |
| <b>rs17496046</b>  | 0                | 0.024            | 0.01                    | 0                 | 1                 | 0                 | 0                 |
| <b>rs148267053</b> | 0                | 0.002            | 0.001                   | 0                 | 0                 | 1                 | 0                 |
| rs11545130         | 0                | 0.003            | 0.001                   | 0                 | 0                 | 0                 | 1                 |

**Apobec 3G - LD Calculations  
1000G- AFR Group**

| RS_number          | S60S<br>1.13E+08 | F119F<br>5757465 | H186R<br><b>8177832</b> | R256H<br>17000736 | Q275E<br>17496046 | G363R<br>1.48E+08 | L371L<br>11545130 |
|--------------------|------------------|------------------|-------------------------|-------------------|-------------------|-------------------|-------------------|
|                    | D'               | D'               | D'                      | D'                | D'                | D'                | D'                |
| rs112603901        | 1                | 1                | 1                       | 1                 | 1                 | 1                 | 1                 |
| rs5757465          | 1                | 1                | 1                       | 1                 | 1                 | 1                 | 1                 |
| <b>rs8177832</b>   | 1                | 1                | 1                       | 1                 | 1                 | 1                 | 1                 |
| <b>rs17000736</b>  | 1                | 1                | 1                       | 1                 | 1                 | 1                 | 1                 |
| <b>rs17496046</b>  | 1                | 1                | 1                       | 1                 | 1                 | 1                 | 1                 |
| <b>rs148267053</b> | 1                | 1                | 1                       | 1                 | 1                 | 1                 | 1                 |
| rs11545130         | 1                | 1                | 1                       | 1                 | 1                 | 1                 | 1                 |
|                    | R <sup>2</sup>   | R <sup>2</sup>   | R <sup>2</sup>          | R <sup>2</sup>    | R <sup>2</sup>    | R <sup>2</sup>    | R <sup>2</sup>    |
| rs112603901        | 1                | 0                | 0.002                   | 0                 | 0                 | 0                 | 0                 |
| rs5757465          | 0                | 1                | 0.022                   | 0                 | 0.004             | 0                 | 0.001             |
| <b>rs8177832</b>   | 0.002            | 0.022            | 1                       | 0.011             | 0.108             | 0.011             | 0.021             |
| <b>rs17000736</b>  | 0                | 0                | 0.011                   | 1                 | 0.002             | 0                 | 0                 |
| <b>rs17496046</b>  | 0                | 0.004            | 0.108                   | 0.002             | 1                 | 0.002             | 0.004             |
| <b>rs148267053</b> | 0                | 0                | 0.011                   | 0                 | 0.002             | 1                 | 0                 |
| rs11545130         | 0                | 0.001            | 0.021                   | 0                 | 0.004             | 0                 | 1                 |

No results were obtained for: A109A (rs375760983). Nonsynonymous SNPs are indicated in **BOLD**
